# Supplementary material for: A systematic review of decision aids that facilitate elements of shared decision-making in chronic illnesses: a review protocol
Source: Springer Nature journal article supplement (doi:10.1186/s13643-017-0557-9), 2017-08-07
Supplement: MOESM3 [file 13354710]

## Data to extract

|                                                                                                                                                                                                                  |
|------------------------------------------------------------------------------------------------------------------------------------------------------------------------------------------------------------------|
| <b>Publication</b>                                                                                                                                                                                               |
| <u>Pilot RCT or RCT</u><br>1. Is the regarding publication a report of a RCT or a pilot RCT? (check one box)<br><br>0 pilot RCT<br><br>0 RCT                                                                     |
| <u>Name RCT</u><br>2. Acronym RCT:<br><br>3. Full name RCT:                                                                                                                                                      |
| <u>Funding source(s) RCT</u><br>4. Name funder RCT:<br><br>5. Copy and paste the text under "Potential conflicts" here:                                                                                          |
| <u>Authors</u><br>6. Authors (as follow: surname 1 <sup>st</sup> author, first initial 1 <sup>st</sup> author, second initial 1 <sup>st</sup> author, ... ; surname 2 <sup>nd</sup> author, ... ; ... etcetera): |
| <u>Title</u><br>7. Full title of publication:                                                                                                                                                                    |
| <u>Publication date</u><br>8. Publication year:                                                                                                                                                                  |
| <u>Journal</u><br>9. Full name of journal:                                                                                                                                                                       |
| <u>Language</u><br>10. The full-text article is written in (before translation by us or our colleagues) (check a box):<br><br>0 English<br><br>0 Spanish                                                         |

German

Other, namely .....

Inclusion criteria

11. Describe all inclusion criteria:

Exclusion criteria

12. Describe all exclusion criteria:

Setting

13. The trial setting is:

primary care

secondary care

tertiary care

both primary, secondary and tertiary care

both primary and secondary care

both primary and tertiary care

both secondary and tertiary care

other, namely .....

Study population

14. Total number of participants included:

15. Total number of participants analysed:

16. Condition (check one or more boxes):

suffering from a cardiovascular disease, namely (give type of CVD)

.....

suffering from diabetes mellitus, namely (give type of DM)

.....

suffering from a chronic respiratory disease, namely (give type of CRD)

.....  
0 other, namely .....

17. Country where RCT took place:

18. Mean age and standard deviation:

19. Percentage males:

20. Percentage females:

Comparison(s)/control intervention(s)

21. Comparison(s)/control intervention(s) (check one or more boxes):

0 usual care (wait-list controls included)

0 active control, namely (give a description) .....

Follow-up period

22. Duration of follow-up (in months):

23. Number of measurement moments (baseline and all follow-up):

Outcome(s) studied

24. Outcome(s) studied (check one or more boxes):

0 SDM outcomes

0 clinical outcomes

0 patient reported outcomes

**DA characteristics**

Name

25. Acronym DA:

26. Name DA:

Description DA

27. Decision to be made (describe as specific as possible):

28. Target group for which the DA meant to be used (describe as specific as possible):

cardiovascular disease patients, namely (give type of CVD)

.....

diabetes mellitus patients, namely (give type of DM)

.....

chronic respiratory disease patients, namely (give type of CRD)

.....

other, namely

.....

29. Setting in which the DA is meant to be used (check one or more boxes):

at the clinicians room

at the patient's home

at the waiting room

other, namely .....

not stated

30. DA to be used by (check one or more boxes):

clinician, namely (check one or more boxes):

general practitioner

nurse

psychologist

clinical specialist, namely (explain kind of specialist) .....

other, namely .....

patient

relatives of the patient

other, namely .....

31. DA delivery format (check one box):

online/digital

- physical (on paper, etcetera)
- partly online/digital and partly physical
- both online/digital available and physical available
- other, namely .....

32. Training is needed for DA use:

- yes
- no

33. Describe how the DA looks like as specific as possible:

34. Describe how the DA is meant to be used as specific as possible:

Funding source(s)

35. Name funder DA:

Availability

36. DA is still available:

- yes
- no

37. Place of availability (check one or more boxes):

- digital (if so, copy and paste the URL here .....) )
- physical (if so, describe where the DA is to be found here .....) )

**Effectiveness**

SDM outcomes (fill in per comparison of trial arms, per time span/interval and per outcome)

38. Compared trial arms:

39. Time span/interval:

40. Type of SDM outcome:

decisional conflict → measurement instrument used: .....

knowledge → measurement instrument used: .....

- 0 patient participation in decision making → measurement instrument used: .....
- 0 treatment decision (preference) → measurement instrument used: .....
- 0 treatment satisfaction → measurement instrument used: .....
- 0 decision satisfaction → measurement instrument used: .....
- 0 conversation satisfaction → measurement instrument used: .....
- 0 risk expectations and perceptions → measurement instrument used: .....
- 0 consultation time → measurement instrument used: .....
- 41. In case of continuous outcomes: point-estimate/beta:
- 42. In case of continuous outcomes: p-value point-estimate/beta:
- 43. In case of continuous outcomes: 95%-CI point-estimate/beta:
- 44. In case of dichotomous outcomes: OR (if RR provided, then calculate OR)<sup>1</sup>:
- 45. In case of dichotomous outcomes: p-value OR:
- 46. In case of dichotomous outcomes: 95%-CI OR (if for RR provided, then calculate for OR)<sup>2</sup>:
- 47. In case of dichotomous outcomes: RR (if OR provided, then calculate RR)<sup>3</sup>:
- 48. In case of dichotomous outcomes: p-value RR:
- 49. In case of dichotomous outcomes: 95%-CI RR (if for OR provided, then calculate for RR)<sup>4</sup>:

Clinical outcomes (fill in per comparison of trial arms, per time span/interval and per outcome)

- 50. Compared trial arms:
- 51. Time span/interval:
- 52. Type of clinical outcome:
- 0 LDL cholesterol → measurement instrument used: .....
- 0 HDL cholesterol → measurement instrument used: .....
- 0 total cholesterol → measurement instrument used: .....
- 0 triglycerides → measurement instrument used: .....
- 0 blood pressure → measurement instrument used: .....
- 0 smoking status → measurement instrument used: .....

0 (maximal) oxygen uptake → measurement instrument used: .....

0 glycaemic control → measurement instrument used: .....

0 Body Mass Index (BMI) → measurement instrument used: .....

0 adherence → measurement instrument used: .....

0 achieving treatment goals → measurement instrument used: .....

53. In case of continuous outcomes: point-estimate/beta:

54. In case of continuous outcomes: p-value point-estimate/beta:

55. In case of continuous outcomes: 95%-CI point-estimate/beta:

56. In case of dichotomous outcomes: OR (if RR provided, then calculate OR)<sup>1</sup>:

57. In case of dichotomous outcomes: p-value OR:

58. In case of dichotomous outcomes: 95%-CI OR (if for RR provided, then calculate for OR)<sup>2</sup>:

59. In case of dichotomous outcomes: RR (if OR provided, then calculate RR)<sup>3</sup>:

60. In case of dichotomous outcomes: p-value RR:

61. In case of dichotomous outcomes: 95%-CI RR (if for OR provided, then calculate for RR)<sup>4</sup>:

Patient reported outcomes (fill in per comparison of trial arms, per time span/interval and per outcome)

62. Compared trial arms:

63. Time span/interval:

64. Type of patient reported outcome:

0 quality of life → measurement instrument used: .....

0 health status → measurement instrument used: .....

0 anxiety → measurement instrument used: .....

0 illness-related distress → measurement instrument used: .....

0 self-efficacy → measurement instrument used: .....

65. In case of continuous outcomes: point-estimate/beta:

66. In case of continuous outcomes: p-value point-estimate/beta:

67. In case of continuous outcomes: 95%-CI point-estimate/beta:

68. In case of dichotomous outcomes: OR (if RR provided, then calculate OR)<sup>1</sup>:

69. In case of dichotomous outcomes: p-value OR:

70. In case of dichotomous outcomes: 95%-CI OR (if for RR provided, then calculate for OR)<sup>2</sup>:

71. In case of dichotomous outcomes: RR (if OR provided, then calculate RR)<sup>3</sup>:

72. In case of dichotomous outcomes: p-value RR:

73. In case of dichotomous outcomes: 95%-CI RR (if for OR provided, then calculate for RR)<sup>4</sup>:

SDM elements

74. DA handles the situation diagnosis element:

0 yes → if so, describe as specific as possible how: .....

0 partly → if so, describe as specific as possible how: .....

0 no

75. DA handles the choice awareness element:

0 yes → if so, describe as specific as possible how: .....

0 partly → if so, describe as specific as possible how: .....

0 no

76. DA handles the option clarification element:

0 yes → if so, describe as specific as possible how: .....

0 partly → if so, describe as specific as possible how: .....

0 no

77. DA handles the harms and benefits discussion element:

0 yes → if so, describe as specific as possible how: .....

0 partly (also to be checked when harms and benefits of some, but not all, options are discussed) → if so, describe as specific as possible how: .....

0 no

78. DA handles the patient preferences deliberation element:

0 yes → if so, describe as specific as possible how: .....



0 partly → if so, describe as specific as possible how: .....

0 no

79. DA handles the decision making element:

0 yes → if so, describe as specific as possible how: .....

0 partly → if so, describe as specific as possible how: .....

0 no

<sup>1</sup>If OR is not presented, then calculate OR

<sup>2</sup>If 95%-CI for OR is not presented, then calculate 95%-CI for OR

<sup>3</sup>If RR is not presented, then calculate RR

<sup>4</sup>If 95%for RR is not presented, then calculate 95%-CI for RR
